# Supplementary material for: Metabolite Contents and Antioxidant Activities of Soybean (Glycine max (L.) Merrill) Seeds of Different Seed Coat Colors
Source: MDPI journal article supplement (doi:10.3390/antiox10081210), 2021-07-28
Supplement: s1 [file s1]

## Supplementary materials

**Table S1.** Ranges, means, and coefficients of variation of all metabolites and antioxidant activities of soybean accessions according to the seed coat color.

| Metabolites/<br>antioxidant activities | Values           | Seed coat color    |                    |                    |
|----------------------------------------|------------------|--------------------|--------------------|--------------------|
|                                        |                  | YL <sup>7</sup>    | GY <sup>8</sup>    | LY <sup>9</sup>    |
| Total protein                          | Range (%)        | 36.46-41.63        | 36.28-44.19        | 37.60-40.32        |
|                                        | Mean (%)         | 39.62 <sup>a</sup> | 39.04 <sup>a</sup> | 38.79 <sup>a</sup> |
|                                        | CV (%)           | 3.80               | 7.74               | 3.04               |
| Total oil                              | Range (%)        | 15.17-18.06        | 13.45-18.98        | 16.37-18.46        |
|                                        | Mean (%)         | 16.55 <sup>a</sup> | 16.97 <sup>a</sup> | 17.59 <sup>a</sup> |
|                                        | CV (%)           | 5.66               | 14.38              | 5.05               |
| Palmitic acid                          | Range (%)        | 10.54-12.19        | 9.90-11.19         | 9.94-11.49         |
|                                        | Mean (%)         | 11.17 <sup>a</sup> | 10.55 <sup>a</sup> | 10.84 <sup>a</sup> |
|                                        | CV (%)           | 5.09               | 5.29               | 6.05               |
| Stearic acid                           | Range (%)        | 2.80-3.60          | 2.82-3.46          | 2.45-3.15          |
|                                        | Mean (%)         | 3.14 <sup>a</sup>  | 3.11 <sup>a</sup>  | 2.72 <sup>b</sup>  |
|                                        | CV (%)           | 7.67               | 8.09               | 11.14              |
| Oleic acid                             | Range (%)        | 16.02-28.33        | 18.11-28.22        | 25.33-38.74        |
|                                        | Mean (%)         | 23.42 <sup>b</sup> | 23.58 <sup>b</sup> | 30.70 <sup>a</sup> |
|                                        | CV (%)           | 19.33              | 15.74              | 20.43              |
| Linoleic acid                          | Range (%)        | 49.22-59.05        | 51.43-59.15        | 43.22-53.86        |
|                                        | Mean (%)         | 53.85 <sup>a</sup> | 54.63 <sup>a</sup> | 49.30 <sup>a</sup> |
|                                        | CV (%)           | 6.25               | 5.91               | 9.73               |
| Linolenic acid                         | Range (%)        | 6.90-10.35         | 7.00-9.63          | 5.37-8.15          |
|                                        | Mean (%)         | 8.42 <sup>a</sup>  | 8.14 <sup>a</sup>  | 6.44 <sup>b</sup>  |
|                                        | CV (%)           | 12.87              | 13.07              | 18.61              |
| TSFA <sup>1</sup>                      | Range (%)        | 13.45-15.17        | 12.99-14.31        | 12.67-14.63        |
|                                        | Mean (%)         | 14.31 <sup>a</sup> | 13.66 <sup>a</sup> | 13.57 <sup>a</sup> |
|                                        | CV (%)           | 4.50               | 4.47               | 5.95               |
| TUFA <sup>2</sup>                      | Range (%)        | 84.83-86.55        | 85.69-87.01        | 85.37-87.33        |
|                                        | Mean (%)         | 85.69 <sup>a</sup> | 86.34 <sup>a</sup> | 86.43 <sup>a</sup> |
|                                        | CV (%)           | 0.75               | 0.71               | 0.93               |
| TPC <sup>3</sup>                       | Range (mg GAE/g) | 3.70-6.74          | 4.07-6.92          | 3.65-5.22          |
|                                        | Mean (mg GAE/g)  | 4.80 <sup>a</sup>  | 5.04 <sup>a</sup>  | 4.69 <sup>a</sup>  |
|                                        | CV (%)           | 18.38              | 23.79              | 15.55              |
| DPPH <sup>4</sup>                      | Range (mg AAE/g) | 0.53-0.63          | 0.50-0.72          | 0.42-0.76          |
|                                        | Mean (mg AAE/g)  | 0.59 <sup>a</sup>  | 0.63 <sup>a</sup>  | 0.57 <sup>a</sup>  |
|                                        | CV               | 5.61               | 13.33              | 24.40              |
| TEAC <sup>5</sup>                      | Range (mg TE/g)  | 3.21-6.58          | 3.13-6.64          | 3.17-5.78          |
|                                        | Mean (mg TE/g)   | 5.40 <sup>a</sup>  | 4.71 <sup>a</sup>  | 4.32 <sup>a</sup>  |
|                                        | CV               | 19.08              | 31.07              | 25.17              |
| FRAP <sup>6</sup>                      | Range (mg AAE/g) | 0.45-1.44          | 0.96-1.54          | 0.19-1.53          |
|                                        | Mean (mg AAE/g)  | 0.85 <sup>a</sup>  | 1.16 <sup>a</sup>  | 0.73 <sup>a</sup>  |
|                                        | CV               | 36.40              | 21.37              | 77.65              |

Mean values in a row with different superscript letters are significantly different ( $p < 0.05$ ). <sup>1</sup>Total saturated fatty acid; <sup>2</sup>Total unsaturated fatty acid; <sup>3</sup>Total phenolic content; <sup>4</sup>DPPH-radical scavenging activity; <sup>5</sup>Trolox equivalent antioxidant capacity; <sup>6</sup>Ferric reducing antioxidant power; <sup>7</sup>Yellow; <sup>8</sup>Greenish-yellow; <sup>9</sup>Light-yellow.

**Table S2.** Pair-wise correlation between metabolites and antioxidant activities computed using Pearson's analysis. Values in the lower bound of the table represent correlation coefficient (*r*) and those in the upper bound represent the corresponding *p*-values.

| Variables         | TPC    | DPPH   | TEAC   | FRAP   | Total protein | Total oil | Palmitic acid | Stearic acid | Oleic acid | Linoleic acid | Linolenic acid | TSFA     | TUFA     |
|-------------------|--------|--------|--------|--------|---------------|-----------|---------------|--------------|------------|---------------|----------------|----------|----------|
| TPC <sup>1</sup>  | 1      | 0.518  | 0.537  | 0.786  | 0.903         | 0.429     | 0.861         | 0.033        | 0.671      | 0.513         | 0.547          | 0.510    | 0.510    |
| DPPH <sup>2</sup> | 0.158  | 1      | 0.149  | 0.001  | 0.065         | 0.206     | 0.910         | 0.004        | 0.159      | 0.086         | 0.936          | 0.339    | 0.339    |
| TEAC <sup>3</sup> | 0.151  | 0.344  | 1      | 0.847  | 0.426         | 0.397     | 0.661         | 0.011        | 0.011      | 0.010         | 0.077          | 0.174    | 0.174    |
| FRAP <sup>4</sup> | 0.067  | 0.750  | -0.048 | 1      | 0.201         | 0.792     | 0.796         | 0.030        | 0.189      | 0.162         | 0.427          | 0.543    | 0.543    |
| Total protein     | -0.030 | -0.432 | -0.194 | -0.307 | 1             | 0.003     | 0.239         | 0.822        | 0.842      | 0.767         | 0.207          | 0.371    | 0.371    |
| Total oil         | 0.193  | 0.304  | 0.206  | -0.065 | -0.646        | 1         | 0.028         | 0.850        | 0.086      | 0.285         | 0.003          | 0.084    | 0.084    |
| Palmitic acid     | -0.043 | -0.028 | 0.108  | -0.064 | 0.284         | -0.503    | 1             | 0.487        | 0.030      | 0.130         | 0.058          | < 0.0001 | < 0.0001 |
| Stearic acid      | 0.491  | 0.625  | 0.571  | 0.498  | -0.055        | 0.047     | 0.170         | 1            | 0.004      | 0.005         | 0.096          | 0.014    | 0.014    |
| Oleic acid        | -0.104 | -0.336 | -0.571 | -0.315 | -0.049        | 0.405     | -0.498        | -0.626       | 1          | < 0.0001      | < 0.0001       | 0.001    | 0.001    |
| Linoleic acid     | 0.160  | 0.405  | 0.574  | 0.334  | -0.073        | -0.258    | 0.360         | 0.615        | -0.969     | 1             | 0.004          | 0.013    | 0.013    |
| Linolenic acid    | -0.147 | 0.020  | 0.415  | 0.193  | 0.303         | -0.650    | 0.443         | 0.393        | -0.780     | 0.626         | 1              | 0.018    | 0.018    |
| TSFA <sup>5</sup> | 0.161  | 0.232  | 0.325  | 0.149  | 0.218         | -0.406    | 0.915         | 0.553        | -0.678     | 0.556         | 0.536          | 1        | < 0.0001 |
| TUFA <sup>6</sup> | -0.161 | -0.232 | -0.325 | -0.149 | -0.218        | 0.406     | -0.915        | -0.553       | 0.678      | -0.556        | -0.536         | -1.000   | 1        |

<sup>1</sup>Total phenolic content; <sup>2</sup>DPPH-radical scavenging activity; <sup>3</sup>Trolox equivalent antioxidant capacity; <sup>4</sup>Ferric reducing antioxidant power; <sup>5</sup>Total saturated fatty acid; <sup>6</sup>Total unsaturated fatty acid.
